# Supplementary material for: Molybdenum(vi) catalysts obtained from η3-allyl dicarbonyl precursors: Synthesis, characterization and catalytic performance in cyclooctene epoxidation
Source: Royal Society of Chemistry journal article supplement (doi:10.1039/c2dt11751g), 2012-01-01
Supplement: c2dt11751g.pdf [file c2dt11751g.pdf]

## Electronic Supporting Information

### **Molybdenum(VI) Catalysts Obtained from $\eta^3$ -Allyl Dicarboxyl Precursors: Synthesis, Characterization and Catalytic Performance in Cyclooctene Epoxidation†**

**Carla A. Gamelas,<sup>a,b</sup> Ana C. Gomes,<sup>c</sup> Sofia M. Bruno,<sup>c</sup> Filipe A. Almeida Paz,<sup>c</sup>  
Anabela A. Valente,<sup>c</sup> Martyn Pillinger,<sup>c</sup> Carlos C. Romão<sup>a</sup> and Isabel S.  
Gonçalves<sup>c,\*</sup>**

<sup>a</sup>*Instituto de Tecnologia Química e Biológica da Universidade Nova de Lisboa, Av. da  
República, Estação Agronómica Nacional, 2780-157 Oeiras, Portugal*

<sup>b</sup>*Escola Superior de Tecnologia, Instituto Politécnico de Setúbal, 2910-761 Setúbal, Portugal*

<sup>c</sup>*Department of Chemistry, CICECO, University of Aveiro, 3810-193 Aveiro, Portugal*

*E-mail: igoncalves@ua.pt; Fax: +351 234 370084*

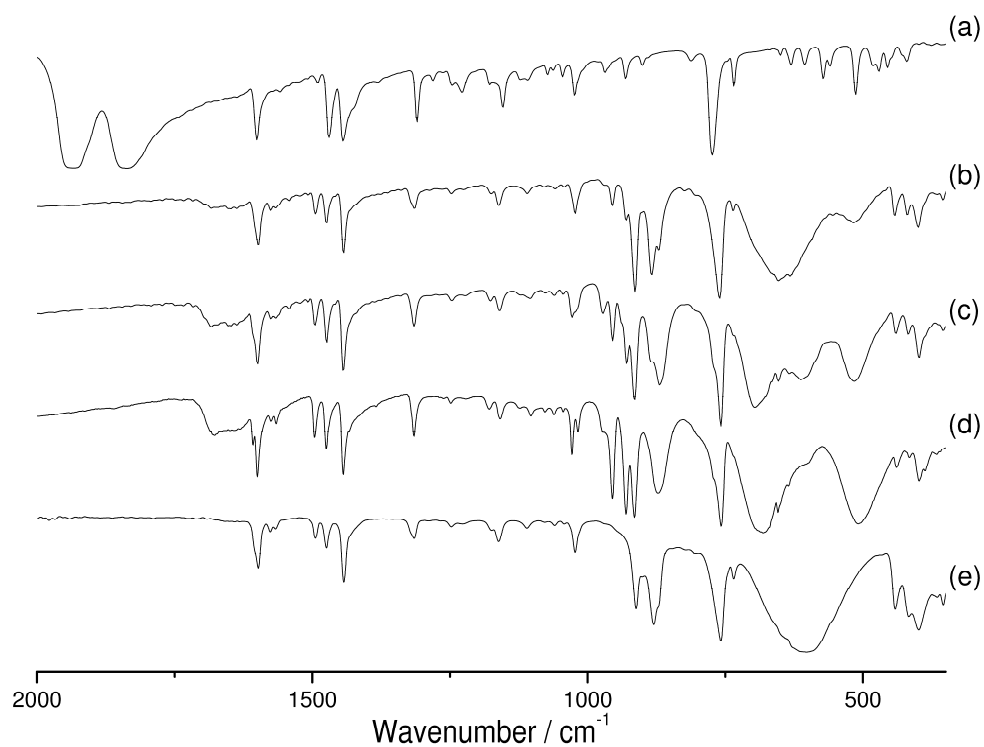

**Fig. S1** FT-IR spectra of  $[\text{Mo}(\eta^3\text{-C}_3\text{H}_5)\text{Cl}(\text{CO})_2(\text{bipy})]$  (**1**) (a), **1\*** (b), **1-H<sub>2</sub>O<sub>2</sub>TBHP55** (c),  $\{[\text{MoO}_3(\text{bipy})][\text{MoO}_3(\text{H}_2\text{O})]\}_n$  (**4**) (d) and  $[\text{MoO}_3(\text{bipy})]$  (e).

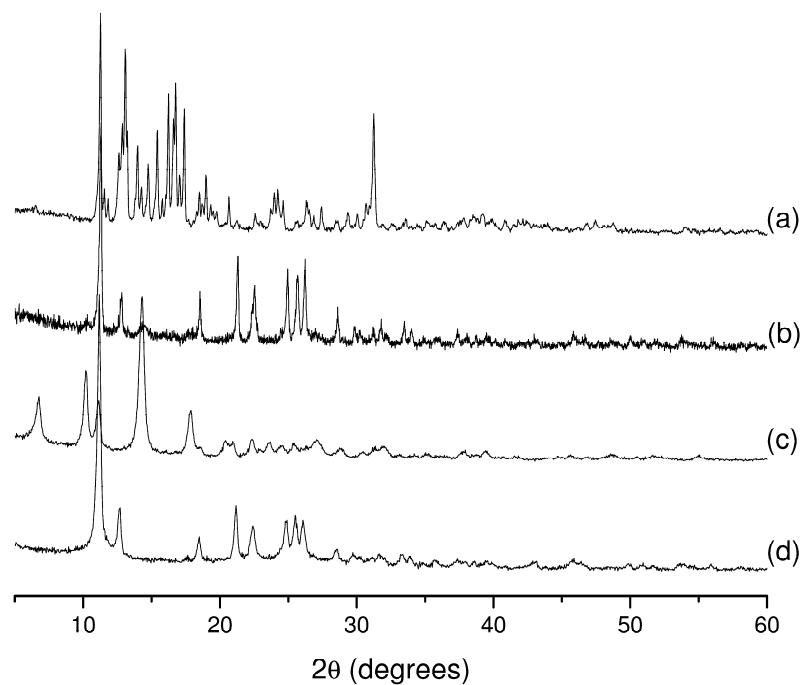

**Fig. S2** Power XRD patterns of  $[\text{Mo}(\eta^3\text{-C}_3\text{H}_5)\text{Cl}(\text{CO})_2(\text{bipy})]$  (**1**) (a), **1\*** (b),  $\{[\text{MoO}_3(\text{bipy})][\text{MoO}_3(\text{H}_2\text{O})]\}_n$  (**4**) (c) and  $[\text{MoO}_3(\text{bipy})]$  (d).

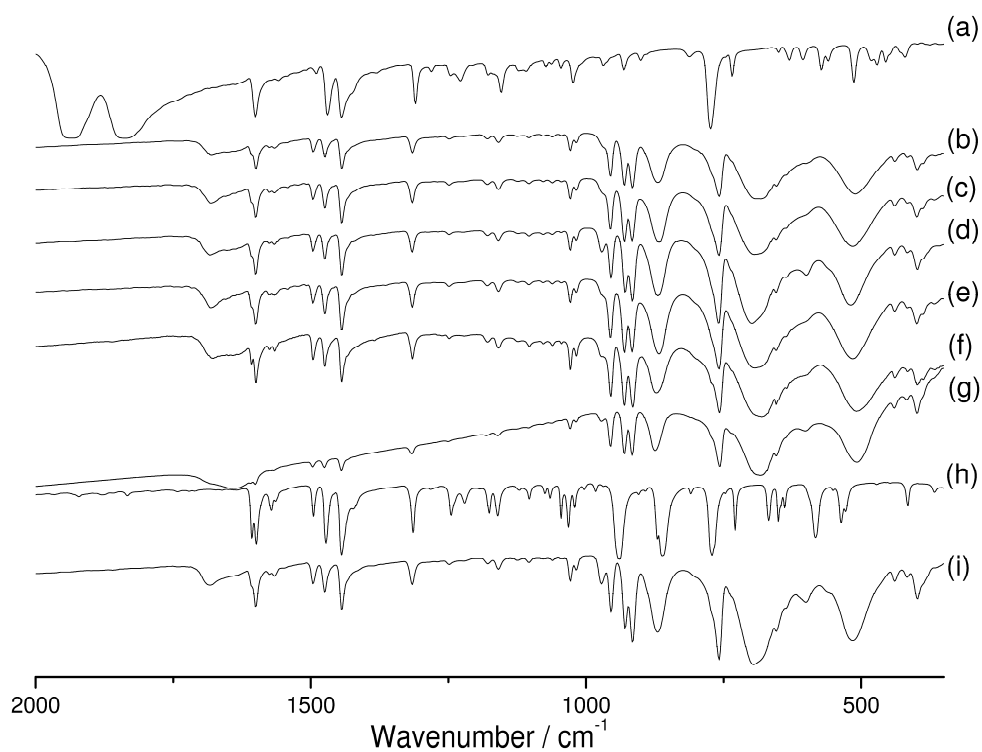

**Fig. S3** FT-IR spectra of:  $[\text{Mo}(\eta^3\text{-C}_3\text{H}_5)\text{Cl}(\text{CO})_2(\text{bipy})]$  (**1**) (a); the solids recovered from the reaction of Cy with TBHP in the presence of **1**, at 70 °C, without adding a solvent (b) or using as solvent H<sub>2</sub>O (c), ethanol (d) or acetonitrile (e);  $\{[\text{MoO}_3(\text{bipy})][\text{MoO}_3(\text{H}_2\text{O})]\}_n$  (**4**) before (f) and after (g) the catalytic reaction using TBHP/H<sub>2</sub>O;  $\text{MoO}(\text{O}_2)_2(\text{bipy})$  (**5**) before (h) and after (i) the catalytic reaction using TBHP/H<sub>2</sub>O.

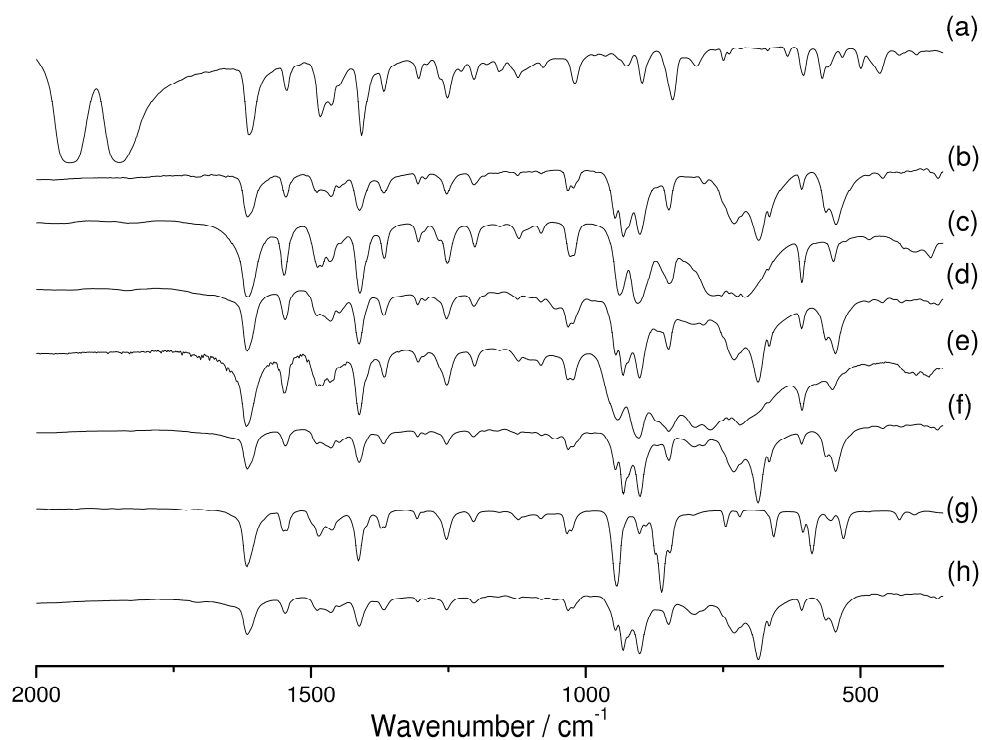

**Fig. S4** FT-IR spectra of:  $[\text{Mo}(\eta^3\text{-C}_3\text{H}_5)\text{Cl}(\text{CO})_2(\text{di-}t\text{Bu-bipy})]$  (**2**) (a); the solid (**2\***) precipitated from the organic phase of the reaction of Cy with TBHP in the presence of **2**, at 24 h/70 °C, using  $\text{H}_2\text{O}$  as solvent (b);  $[\text{MoO}_2\text{Cl}(\text{di-}t\text{Bu-bipy})]_2\text{O}$  (**6**) before (c) and after (d) the catalytic reaction using TBHP/ $\text{H}_2\text{O}$ ;  $[\text{Mo}_8\text{O}_{24}(\text{di-}t\text{Bu-bipy})_4]$  (**7**) before (e) and after (f) the catalytic reaction using TBHP/ $\text{H}_2\text{O}$ ;  $\text{MoO}(\text{O}_2)_2(\text{di-}t\text{Bu-bipy})$  (**8**) before (g) and after (h) the catalytic reaction using TBHP/ $\text{H}_2\text{O}$ .

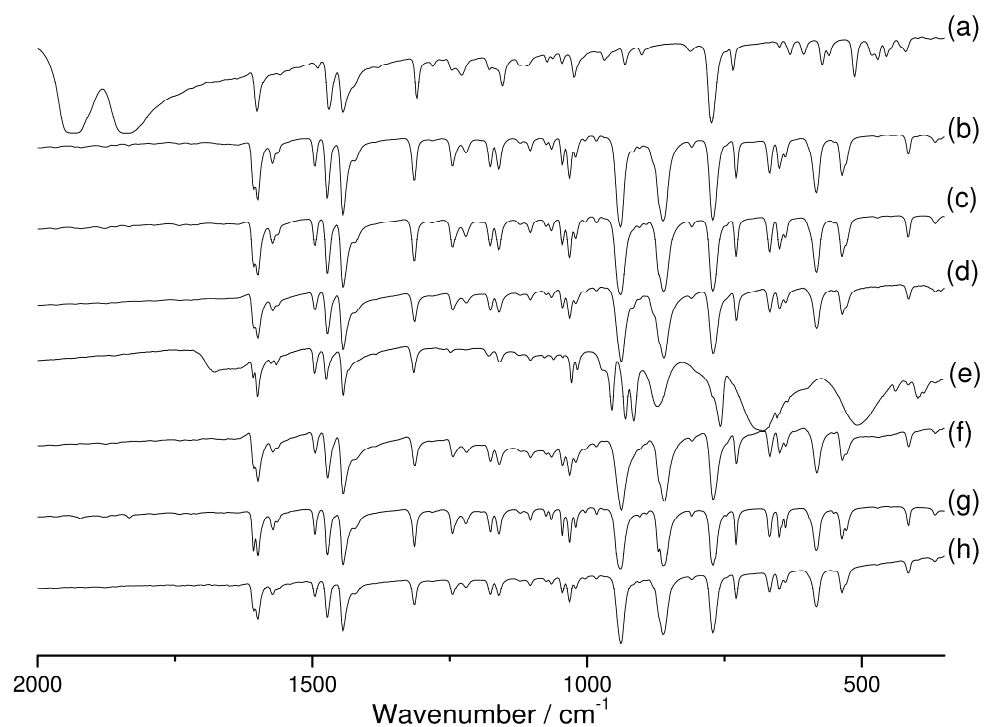

**Fig. S5** FT-IR spectra of: [Mo( $\eta^3$ -C<sub>3</sub>H<sub>5</sub>)Cl(CO)<sub>2</sub>(bipy)] (**1**) (a); the solids recovered from the reaction of Cy with H<sub>2</sub>O<sub>2</sub> in the presence of **1**, at 24 h/70 °C, using as solvent H<sub>2</sub>O (b), ethanol (c) or acetonitrile (d); {[MoO<sub>3</sub>(bipy)][MoO<sub>3</sub>(H<sub>2</sub>O)]}<sub>n</sub> (**4**) before (e) and after (f) the catalytic reaction using H<sub>2</sub>O<sub>2</sub>/H<sub>2</sub>O; MoO(O<sub>2</sub>)<sub>2</sub>(bipy) (**5**) before (g) and after (h) the catalytic reaction using H<sub>2</sub>O<sub>2</sub>/H<sub>2</sub>O.

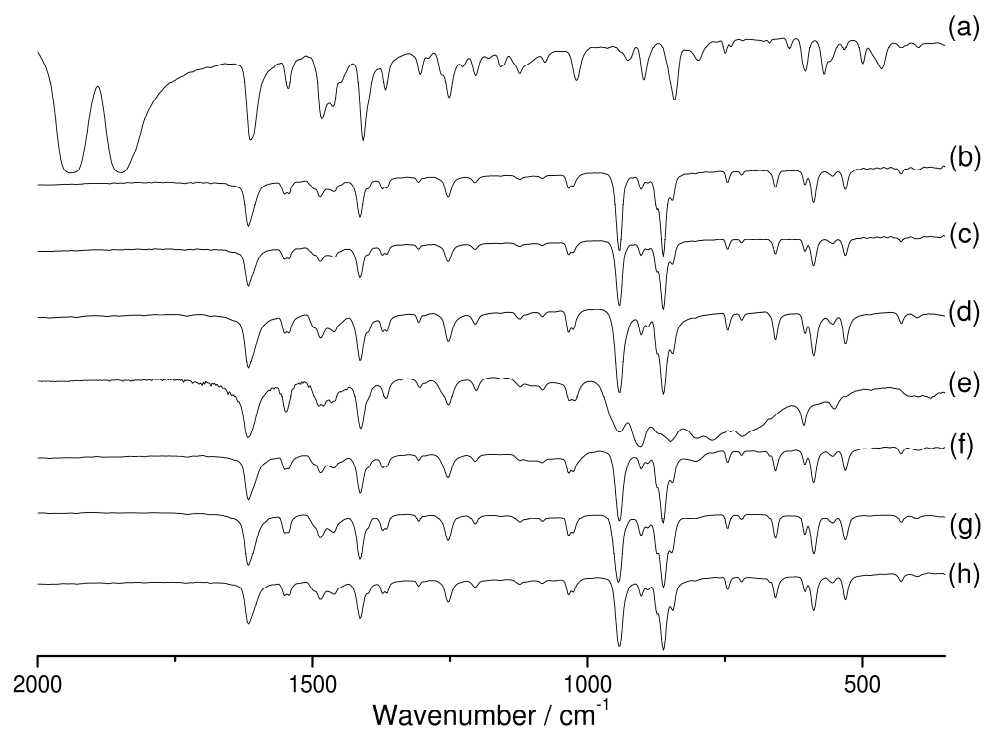

**Fig. S6** FT-IR spectra of: [Mo( $\eta^3$ -C<sub>3</sub>H<sub>5</sub>)Cl(CO)<sub>2</sub>(di-*t*Bu-bipy)] (**2**) (a); the solids recovered from the reaction of Cy with H<sub>2</sub>O<sub>2</sub> in the presence of **2**, at 24 h/70 °C, using as solvent H<sub>2</sub>O (b), ethanol (c) or acetonitrile (d); [Mo<sub>8</sub>O<sub>24</sub>(di-*t*Bu-bipy)<sub>4</sub>] (**7**) before (e) and after (f) the catalytic reaction using H<sub>2</sub>O<sub>2</sub>/H<sub>2</sub>O; MoO(O<sub>2</sub>)<sub>2</sub>(di-*t*Bu-bipy) (**8**) before (g) and after (h) the catalytic reaction using H<sub>2</sub>O<sub>2</sub>/H<sub>2</sub>O.

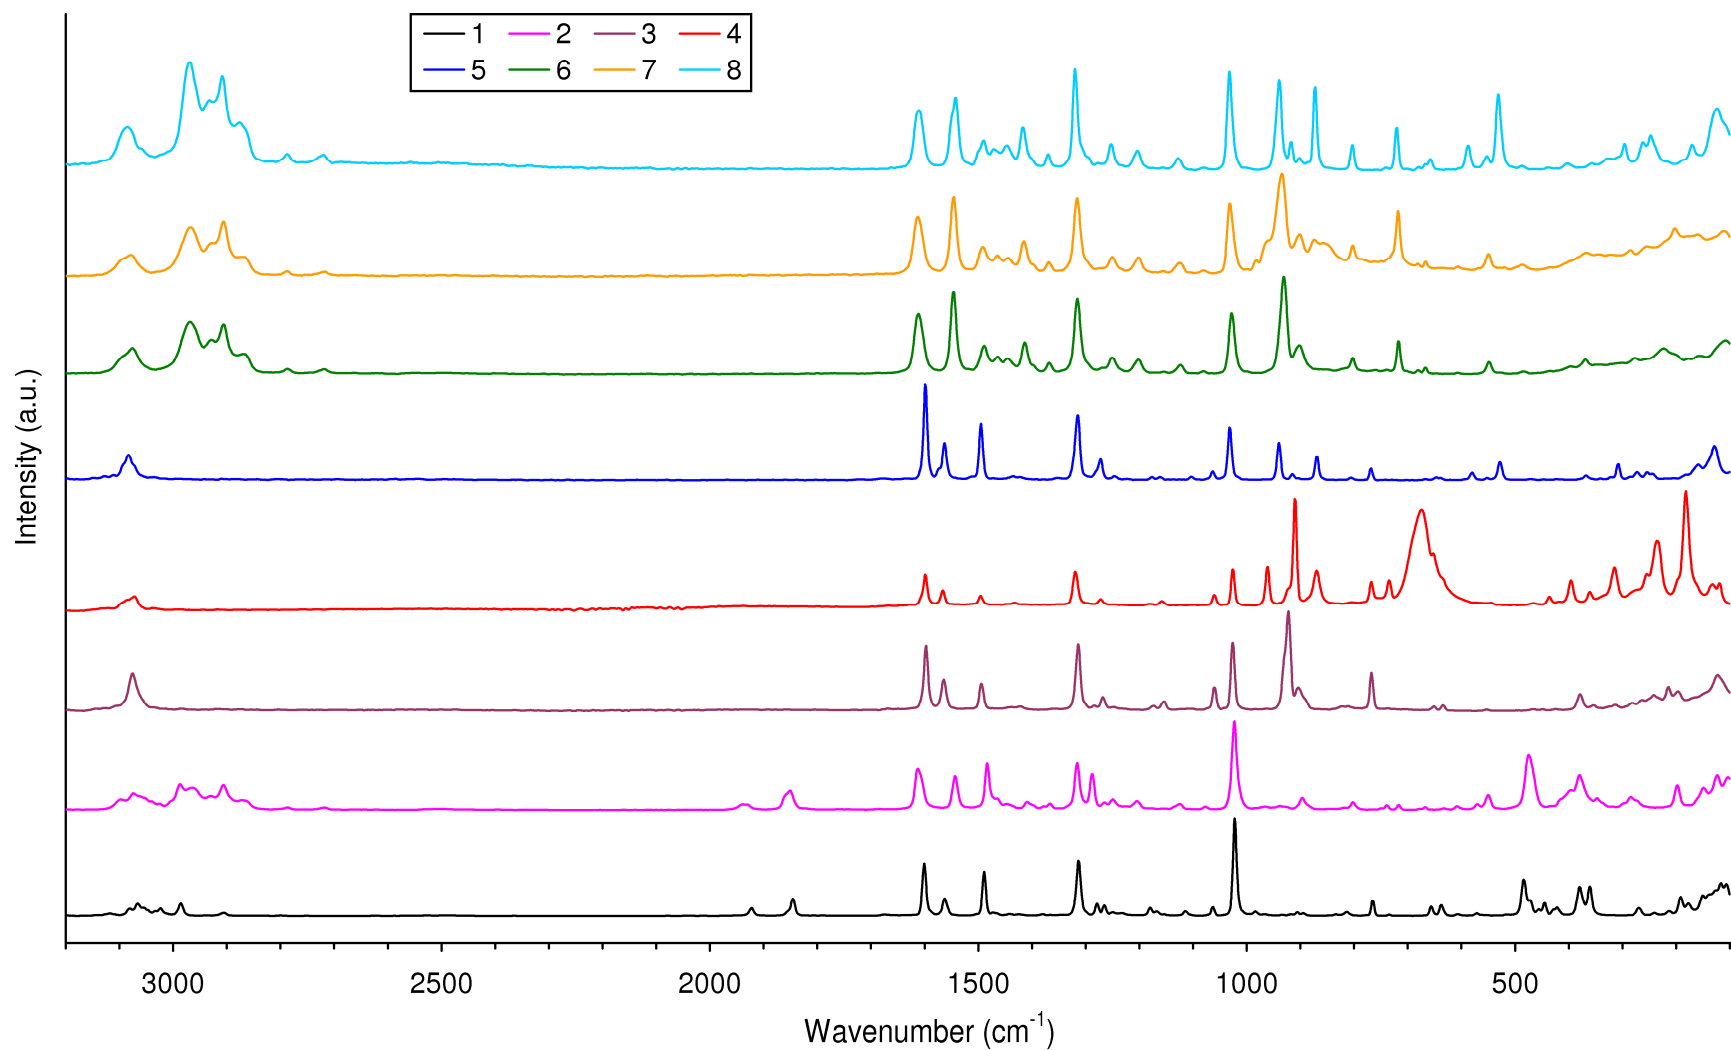

**Fig. S7** FT-Raman spectra of  $[\text{Mo}(\eta^3\text{-C}_3\text{H}_5)\text{Cl}(\text{CO})_2(\text{bipy})]$  (**1**),  $[\text{Mo}(\eta^3\text{-C}_3\text{H}_5)\text{Cl}(\text{CO})_2(\text{di-}t\text{Bu-bipy})]$  (**2**),  $[\text{MoO}_2\text{Cl}(\text{bipy})]_2\text{O}$  (**3**),  $\{[\text{MoO}_3(\text{bipy})][\text{MoO}_3(\text{H}_2\text{O})]\}_n$  (**4**),  $\text{MoO}(\text{O}_2)_2(\text{bipy})$  (**5**),  $[\text{MoO}_2\text{Cl}(\text{di-}t\text{Bu-bipy})]_2\text{O}$  (**6**),  $[\text{Mo}_8\text{O}_{24}(\text{di-}t\text{Bu-bipy})_4]$  (**7**),  $\text{MoO}(\text{O}_2)_2(\text{di-}t\text{Bu-bipy})$  (**8**).
